# Supplementary material
Source: publisher figshare collection journal article supplement (https://acs.figshare.com/ndownloader/files/4190248)
Supplement: Supplementary file 1 [file 4190248]

## SUPPORTING INFORMATION

**Synthesis and biological activity of 6-substituted pyrrolo[2,3-*d*]pyrimidine thienoyl regioisomers as inhibitors of *de novo* purine biosynthesis with selectivity for cellular uptake by high affinity folate receptors and the proton-coupled folate transporter over the reduced folate carrier<sup>†</sup>**

Lei Wang<sup>£¥</sup>, Christina Cherian<sup>||¥#</sup>, Sita Kugel Desmoulin<sup>‡#</sup>, Shermaine Mitchell-Ryan<sup>‡</sup>, Zhanjun Hou<sup>||#</sup>, Larry H. Matherly<sup>‡#§||€\*</sup>, and Aleem Gangjee<sup>£€\*</sup>

**Figure 1S. Colony formation assay**

**Elemental Analysis**

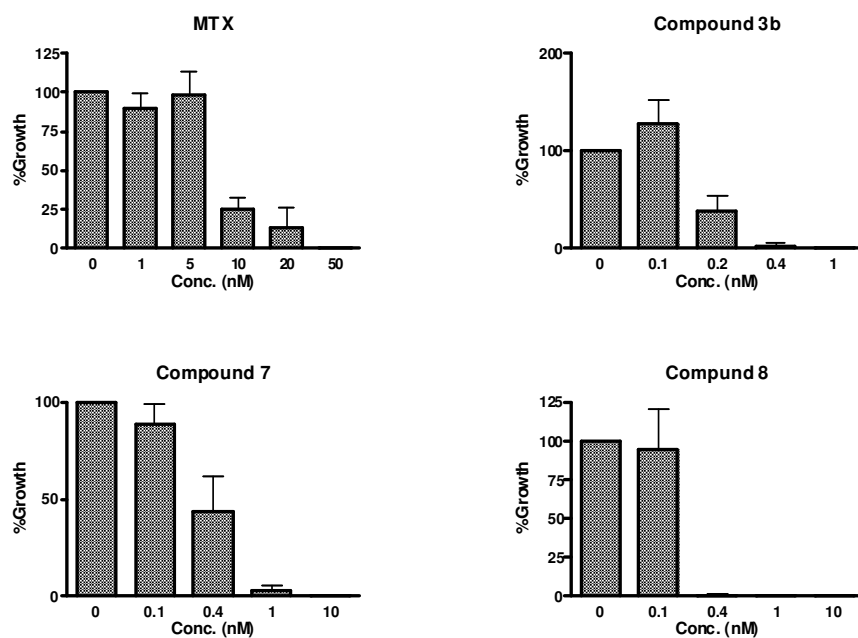

**Figure 1S. Colony formation assay.** KB cells were inoculated into 60 mm dishes (500 cells per dish), in the presence or absence of a range of concentrations of compound **3b**, compound **7**, compound **8**, or MTX. Colonies were enumerated and results are presented as percent of control treated identically but without drugs, as mean values from 3 experiments (plus/minus SEM). IC<sub>50</sub>s were as follows: **3b**, 0.20 nM; **7**, 0.39 nM; **8**, 0.16 nM; and MTX, 8.5 nM.

## Elemental Analysis

|           |                                                                                             | Calcd, % |      |       |      | Found, % |      |       |      |
|-----------|---------------------------------------------------------------------------------------------|----------|------|-------|------|----------|------|-------|------|
| Cpd       | Formula                                                                                     | C        | H    | N     | S    | C        | H    | N     | S    |
| <b>4</b>  | $\text{C}_{20}\text{H}_{23}\text{N}_5\text{O}_6\text{S} \cdot 1.85 \text{ H}_2\text{O}$     | 48.55    | 5.44 | 14.15 | 6.48 | 48.60    | 5.09 | 13.90 | 6.23 |
| <b>5</b>  | $\text{C}_{20}\text{H}_{23}\text{N}_5\text{O}_6\text{S} \cdot 1.0 \text{ H}_2\text{O}$      | 50.10    | 5.26 | 14.61 | 6.69 | 50.12    | 5.18 | 14.41 | 6.43 |
| <b>6</b>  | $\text{C}_{20}\text{H}_{23}\text{N}_5\text{O}_6\text{S} \cdot 0.4 \text{ CHCl}_3$           | 48.11    | 4.63 | 13.75 | 6.30 | 48.15    | 4.79 | 13.66 | 5.95 |
| <b>7</b>  | $\text{C}_{20}\text{H}_{23}\text{N}_5\text{O}_6\text{S} \cdot 0.31 \text{ CHCl}_3$          | 48.93    | 4.71 | 14.04 | 6.43 | 49.01    | 5.04 | 13.64 | 6.31 |
| <b>8</b>  | $\text{C}_{20}\text{H}_{23}\text{N}_5\text{O}_6\text{S} \cdot 1.5 \text{ H}_2\text{O}$      | 49.17    | 5.36 | 14.34 | 6.56 | 48.85    | 4.96 | 14.00 | 6.49 |
| <b>9</b>  | $\text{C}_{20}\text{H}_{19}\text{N}_5\text{O}_6\text{S} \cdot 1.0 \text{ CH}_3\text{COOH}$  | 51.06    | 4.48 | 13.53 | 6.20 | 50.66    | 4.22 | 13.57 | 6.25 |
| <b>10</b> | $\text{C}_{20}\text{H}_{19}\text{N}_5\text{O}_6\text{S} \cdot 0.3 \text{ CHCl}_3$           | 49.43    | 3.94 | 14.20 | 6.50 | 49.71    | 4.30 | 14.01 | 6.31 |
| <b>11</b> | $\text{C}_{20}\text{H}_{19}\text{N}_5\text{O}_6\text{S} \cdot 0.3 \text{ CHCl}_3$           | 49.43    | 3.94 | 14.20 | 6.50 | 49.80    | 4.14 | 13.95 | 6.15 |
| <b>12</b> | $\text{C}_{20}\text{H}_{19}\text{N}_5\text{O}_6\text{S} \cdot 0.37 \text{ CH}_2\text{Cl}_2$ | 50.04    | 4.07 | 14.33 | 6.56 | 50.40    | 4.13 | 13.95 | 6.53 |
| <b>13</b> | $\text{C}_{20}\text{H}_{19}\text{N}_5\text{O}_6\text{S} \cdot 0.41 \text{ CH}_2\text{Cl}_2$ | 49.80    | 4.06 | 14.23 | 6.51 | 50.02    | 4.21 | 13.83 | 6.41 |
